# Supplementary material for: Mechanistic investigation of cyclohexane oxidation by a non-heme iron complex: evidence of product inhibition by UV/vis stopped-flow studies
Source: Royal Society of Chemistry journal article supplement (doi:10.1039/c1dt11841b), 2011-11-22
Supplement: c1dt11841b.pdf [file c1dt11841b.pdf]

Supplementary information for

**Mechanistic Investigation of cyclohexane oxidation by a binuclear non-heme iron model complex: Evidence of product inhibition by low-temperature stopped-flow studies**

Lauren C. Gregor<sup>†</sup>, Gerard T. Rowe<sup>†</sup>, Elena Rybak-Akimova<sup>‡</sup>, and John P. Caradonna<sup>\*,†</sup>

<sup>†</sup>Department of Chemistry, Boston University, Boston, Massachusetts 02215

<sup>‡</sup>Department of Chemistry, Tufts University, Medford, Massachusetts 02115

| Page      | Content                                                                                 |
|-----------|-----------------------------------------------------------------------------------------|
| S2        | <i>Figure S1</i> : 400 MHz <sup>1</sup> H-NMR Spectrum of MPP-OL-Cl <sub>6</sub>        |
| S3        | <i>Figure S2</i> : 400 MHz <sup>13</sup> C-NMR Spectrum of MPP-OLCl <sub>6</sub>        |
| S4        | <i>Figure S3</i> : 400 MHz <sup>1</sup> H-NMR Spectrum of MPPH-Cl <sub>6</sub>          |
| S5        | <i>Figure S4</i> : 400 MHz <sup>13</sup> C-NMR Spectrum of MPPH-Cl <sub>6</sub>         |
| S6        | <i>Figure S5</i> : Diode-array spectrum of <b>1</b> with MPPH-Cl <sub>6</sub>           |
| S7        | <i>Figure S6</i> : Single-wavelength spectrum of <b>1</b> with MPPH-Cl <sub>6</sub>     |
| S8        | <i>Figure S7</i> : Simulation of <i>k<sub>f</sub></i> for MPPH and MPPH-Cl <sub>6</sub> |
| S9        | <i>Figure S8</i> : Heterolytic/homolytic cleavage of MPPH                               |
| S10       | <i>Figure S9</i> : Time course reactivity of cyclohexane                                |
| S11       | <i>Figure S10</i> : Effect of single wavelength data by cyclohexanol                    |
| S12       | <i>Figure S11</i> : Kinetic data and fit for cyclohexanol at 438 nm                     |
| S13       | <i>Figure S12</i> : Kinetic data and fit for methanol at 438 nm                         |
| S14       | <i>Figure S13</i> : Kinetic data and fit for MPP-OL at 438 nm                           |
| S15       | <i>Table S1</i> : Kinetic data for cyclohexanol                                         |
| S16       | <i>Table S2</i> : Kinetic data for methanol                                             |
| S17       | <i>Table S3</i> : Kinetic data for MPP-OL                                               |
| S18       | <i>Figure S14</i> : Electrochemistry of <b>1</b> with cyclohexanol                      |
| S19       | <i>Figure S15</i> : Inhibition of <b>1</b> utilizing hydroxyurea                        |
| S20       | Equations used in kinetic fits of model in Scheme 1                                     |
| S21 – S24 | <i>Figures S16-S19</i> : Kinetic data and fit for eliminated models                     |
| S25       | References                                                                              |

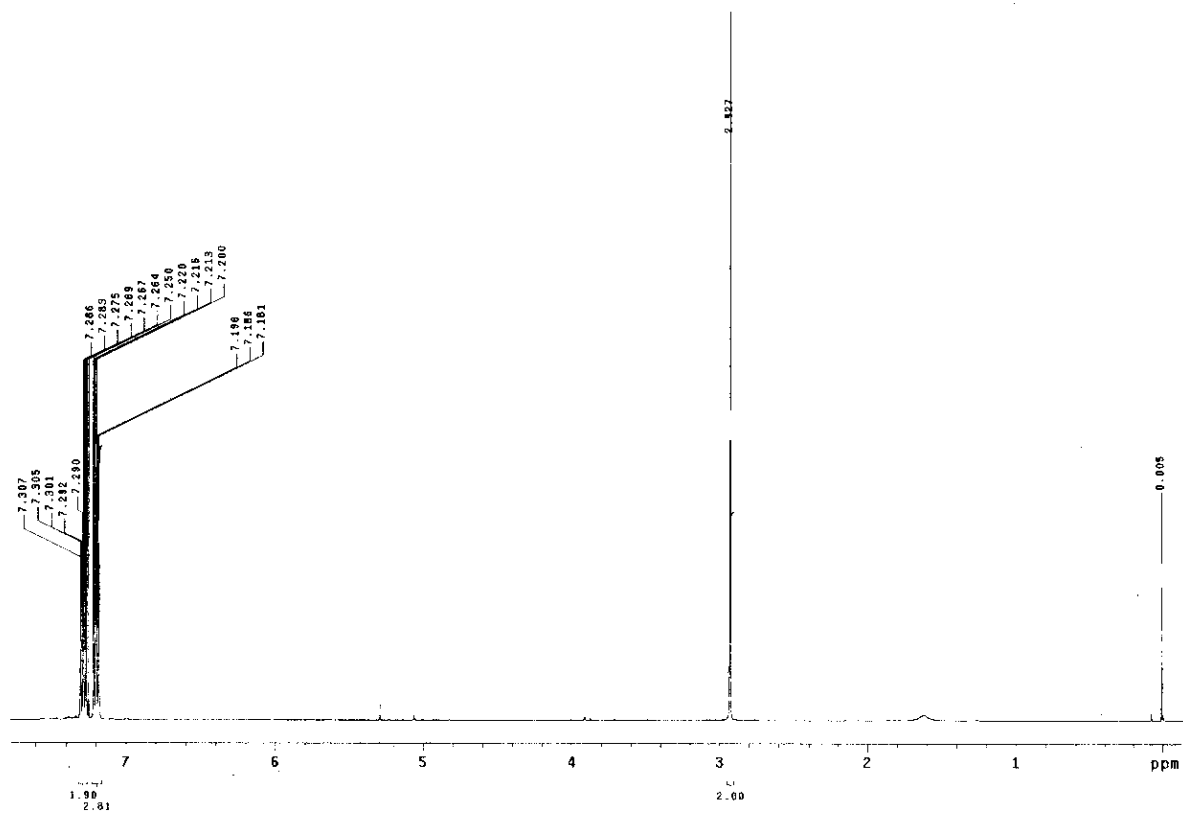

**Figure S1:** 400 MHz <sup>1</sup>H-NMR spectrum of MPP-OL-Cl<sub>6</sub> in CDCl<sub>3</sub>.

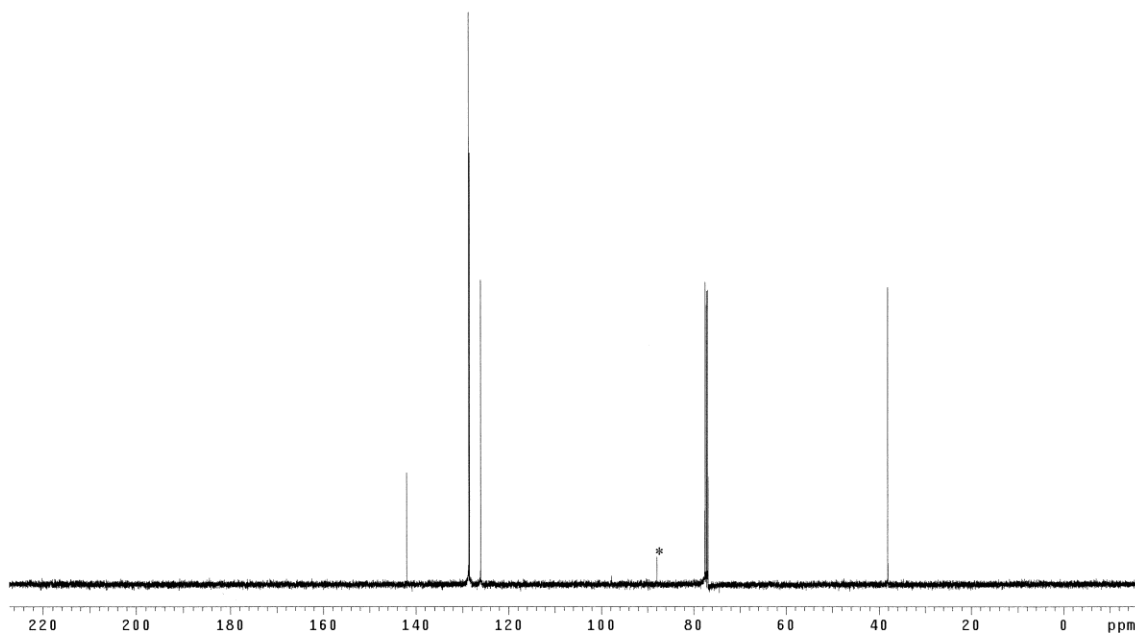

**Figure S2:** 400 MHz  $^{13}\text{C}$ -NMR Spectrum of MPP-OL-Cl<sub>6</sub> in CDCl<sub>3</sub>. Starred peak indicates signal from residual hexachloroacetone starting material.

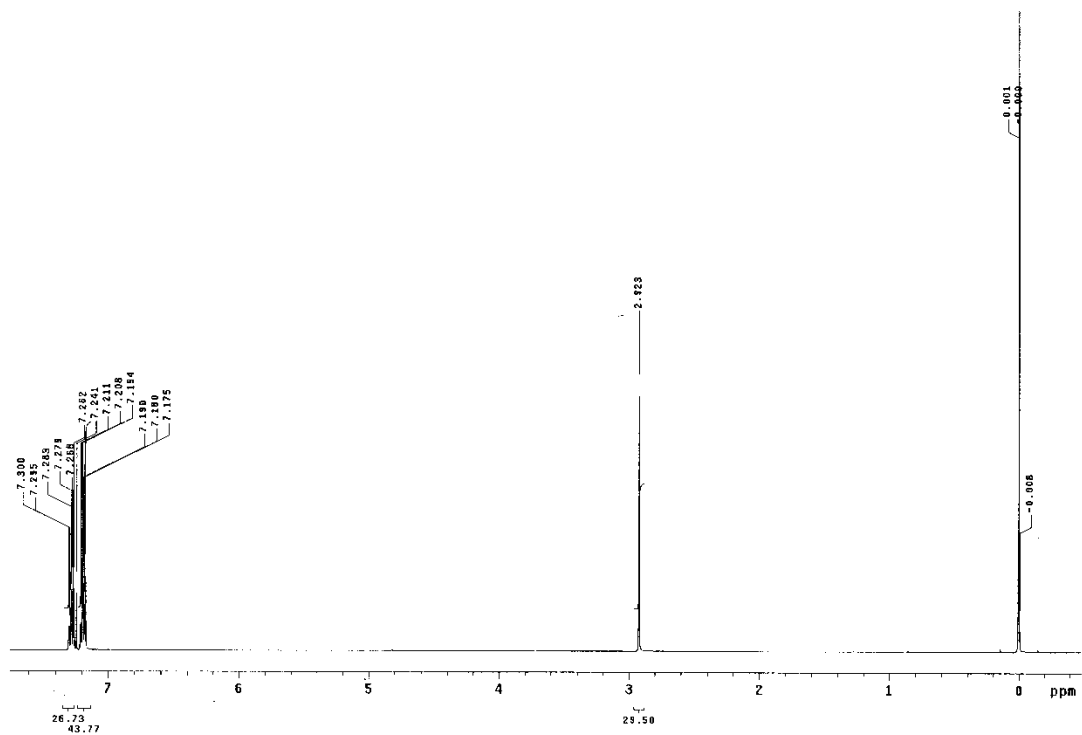

**Figure S3:** 400 MHz <sup>1</sup>H-NMR Spectrum of MPPH-Cl<sub>6</sub> in CDCl<sub>3</sub>.

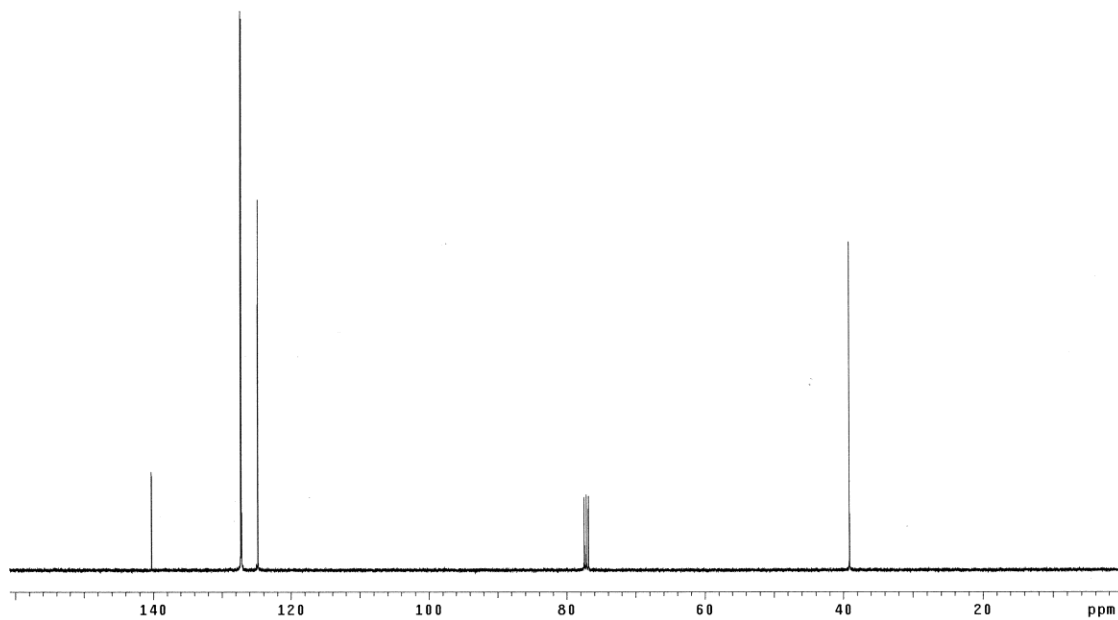

**Figure S4:** 400 MHz  $^{13}\text{C}$ -NMR Spectrum of MPPH- $\text{Cl}_6$  in  $\text{CDCl}_3$ .

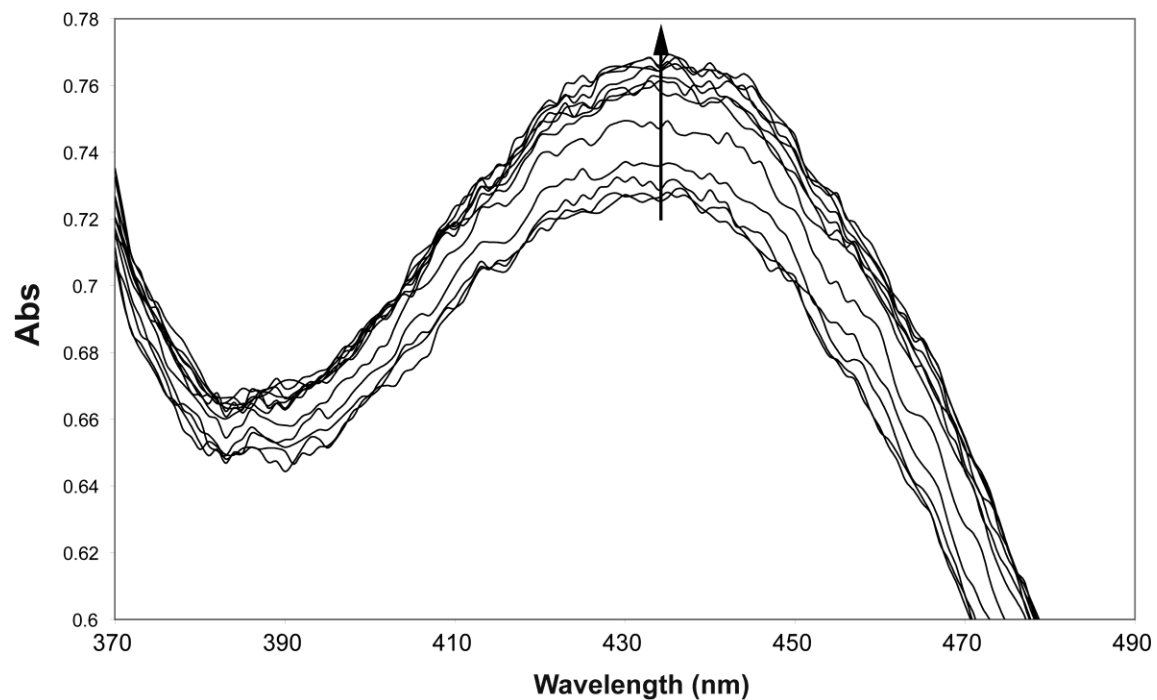

**Figure S5:** Diode-array mode stopped-flow spectra of the reaction of **1** with MPPH-Cl<sub>6</sub> at -75°C. Data represents the first second of the reaction time. [1] = 0.21 mM and [MPPH-Cl<sub>6</sub>] = 53 mM. Scans acquired every 10 ms for a total of 108 samples. 12 scans across the entire time regime displayed here for clarity.

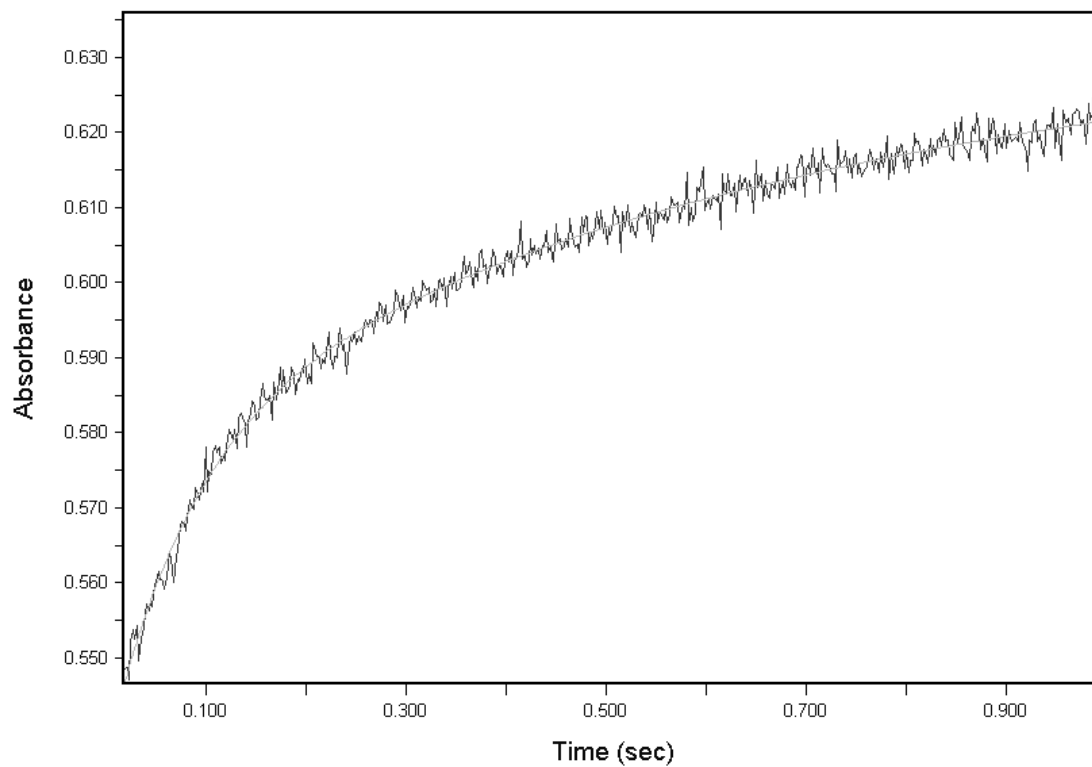

**Figure S6:** Single-wavelength-mode stopped-flow absorbance (438 nm) versus time for the first second of the reaction of MPPH-Cl<sub>6</sub> with **1** at -75°C. [**1**] = 0.21 mM and [MPPH-Cl<sub>6</sub>] = 53 mM.

### Simulation of Intermediate Formation at -75° C

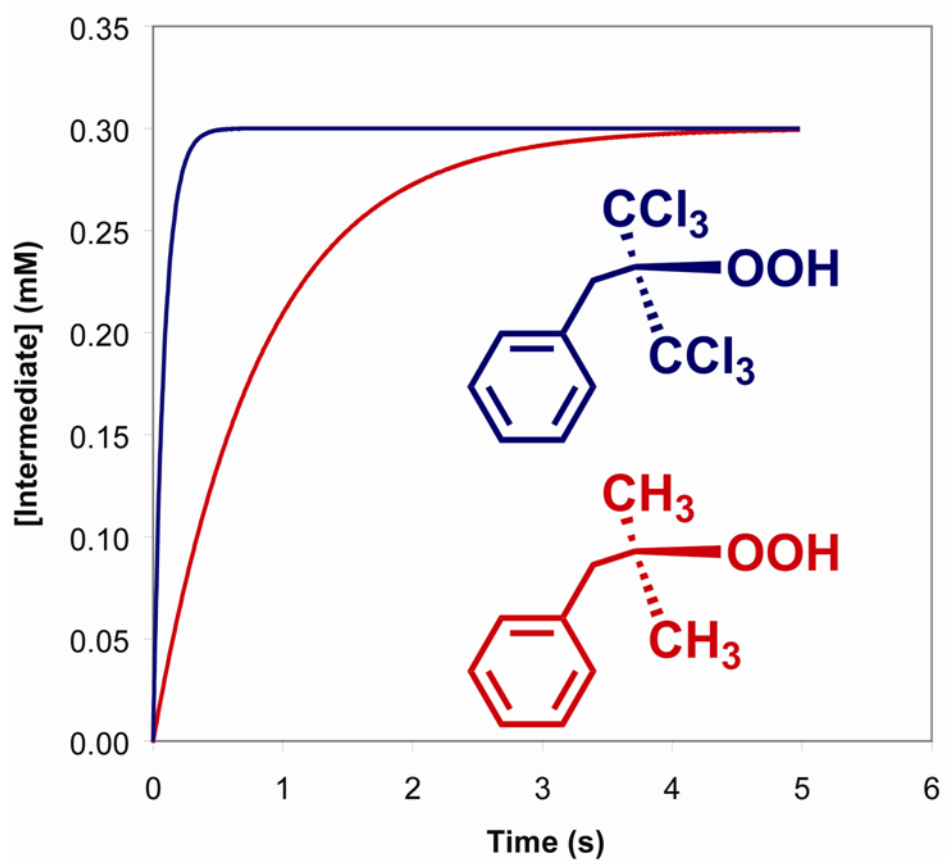

**Figure S7:** Simulation of  $k_1$  reaction using the second order rate constants determined for 1+MPPH and 1+MPPH- $\text{Cl}_6$  reactions measure at -75°C.  $[\mathbf{1}] = 0.3$  mM and  $[\text{R-OOH}] = 50$  mM.



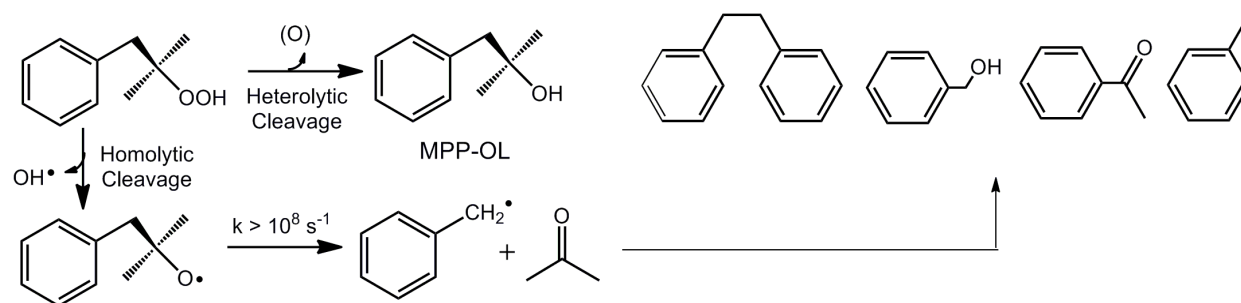

**Figure S8:** Heterolytic/homolytic decomposition pathways of MPPH

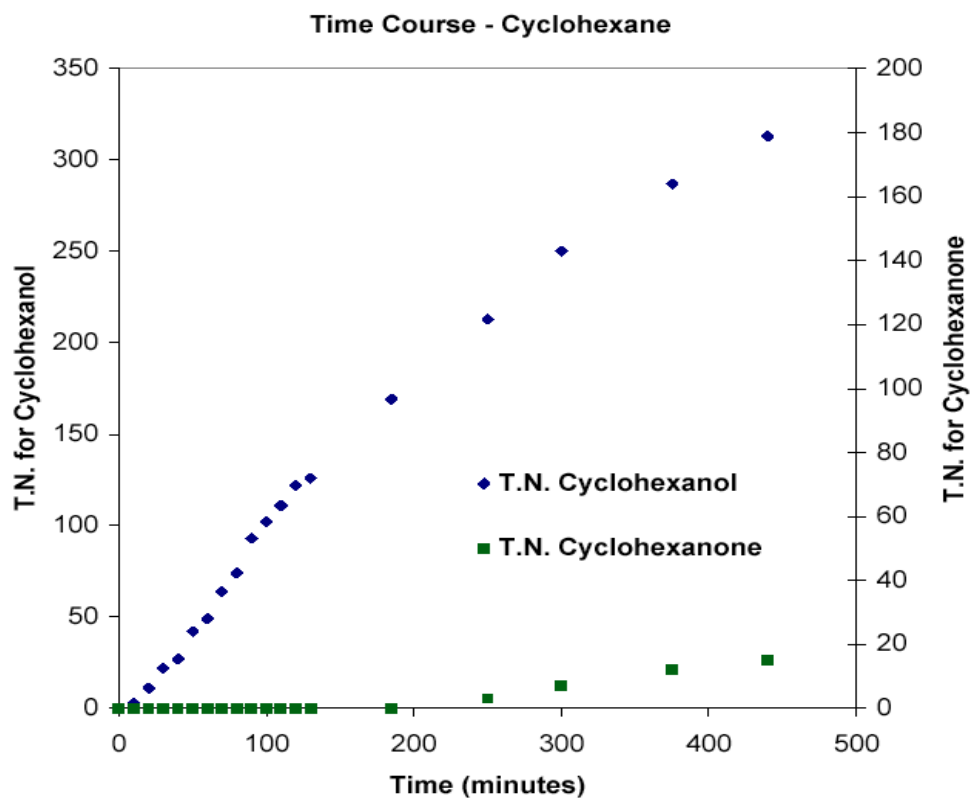

*Figure S9*: Time course reactivity of **1** with MPPH as oxidant and cyclohexane as substrate.

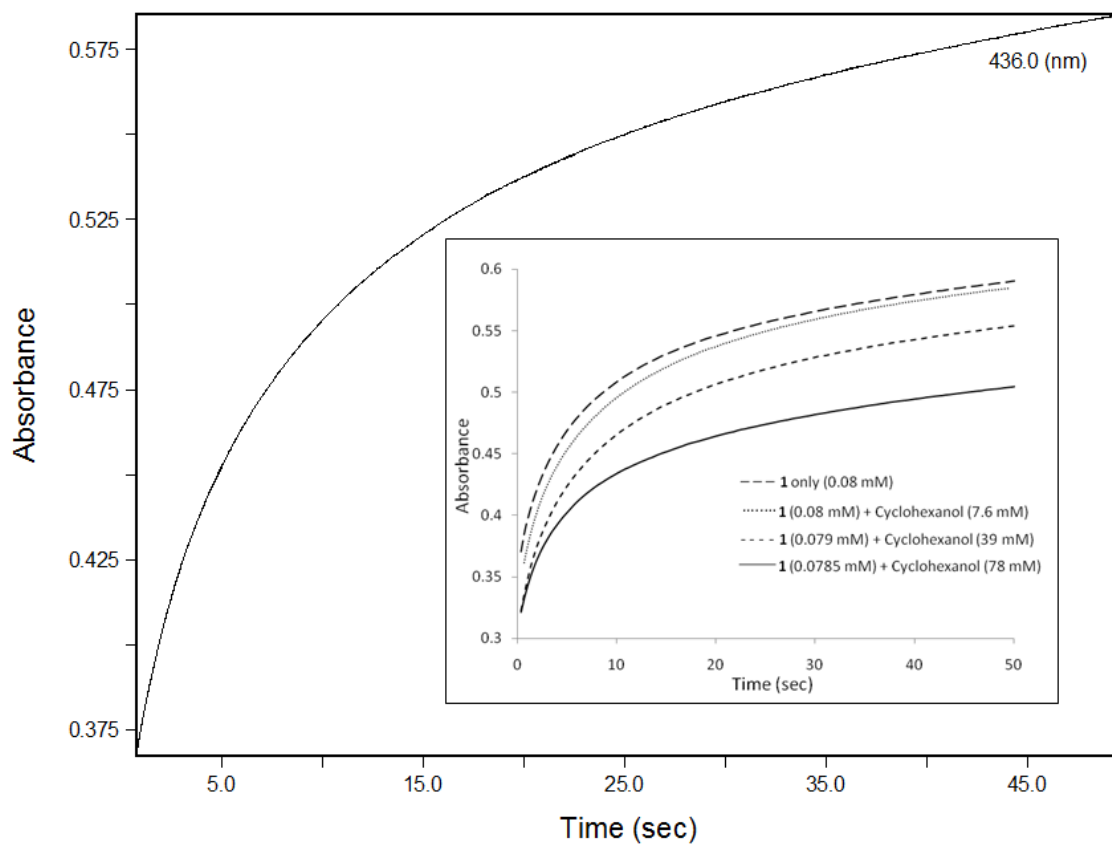

**Figure S10:** Single wavelength data and kinetic fit for **1** (0.08 mM) and MPPH (9.2 mM) with cyclohexanol (7.6 mM). Inset: Effect of single-wavelength data by addition of cyclohexanol

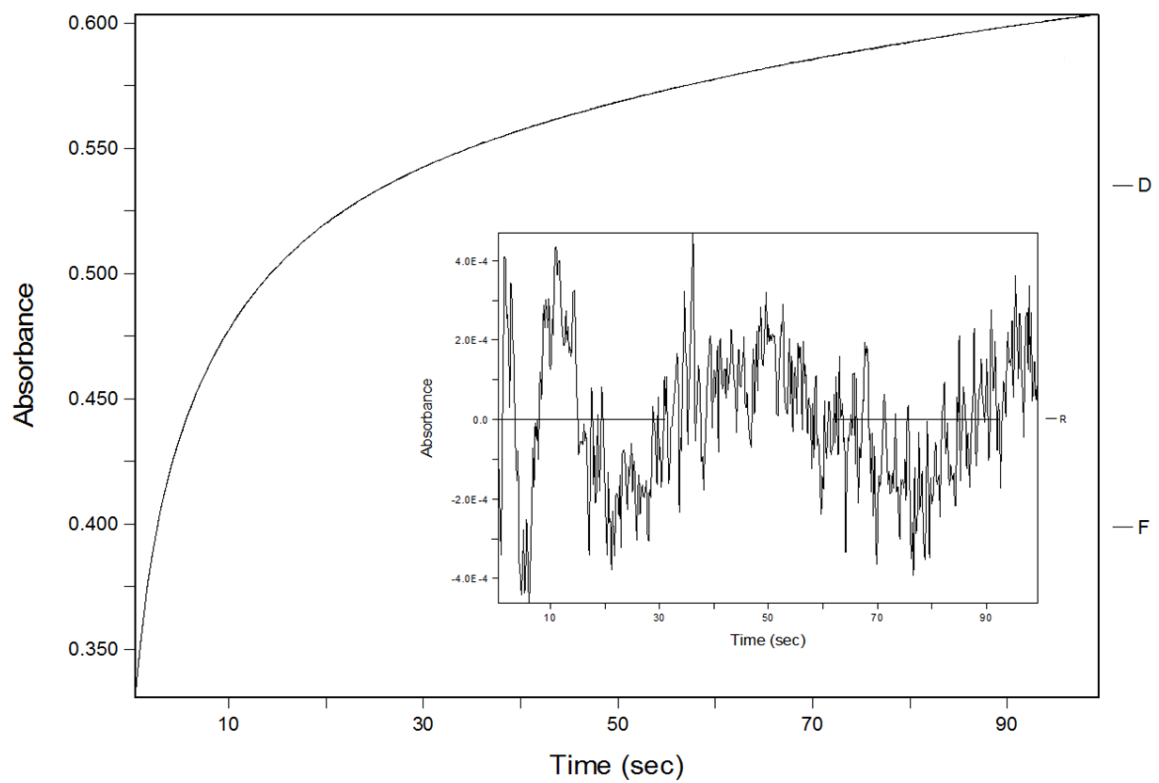

**Figure S11:** Kinetic data at 438 nm and overlay of fit for the reaction of **1** (0.079 mM) and cyclohexanol (78 mM) and 2-methyl-1-phenylprop-2-yl hydroperoxide (9.2 mM) at 193 K. Inset: residuals from fit.

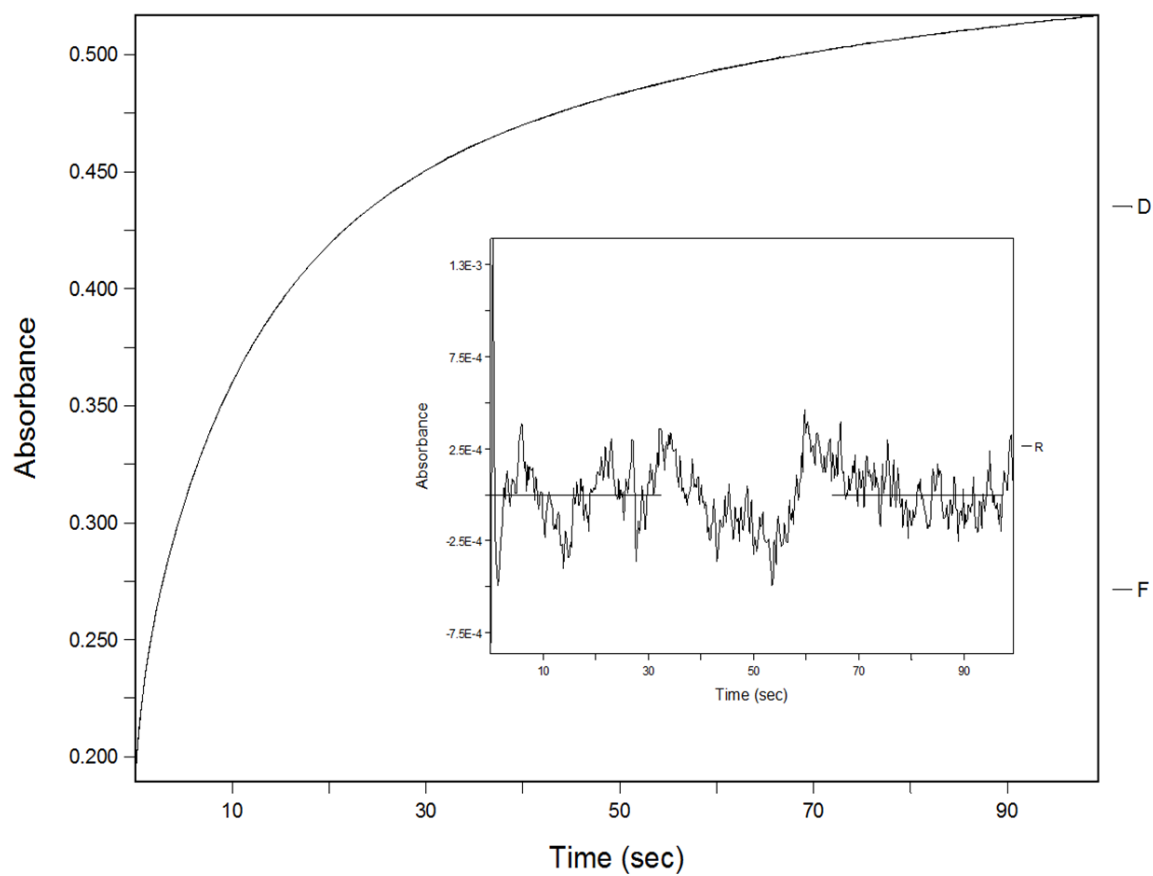

**Figure S12:** Kinetic data at 438 nm and overlay of fit for the reaction of **1** (0.11 mM) and methanol (11 mM) and 2-methyl-1-phenylprop-2-yl hydroperoxide (12.3 mM) at 193 K. Inset: residuals from fit.

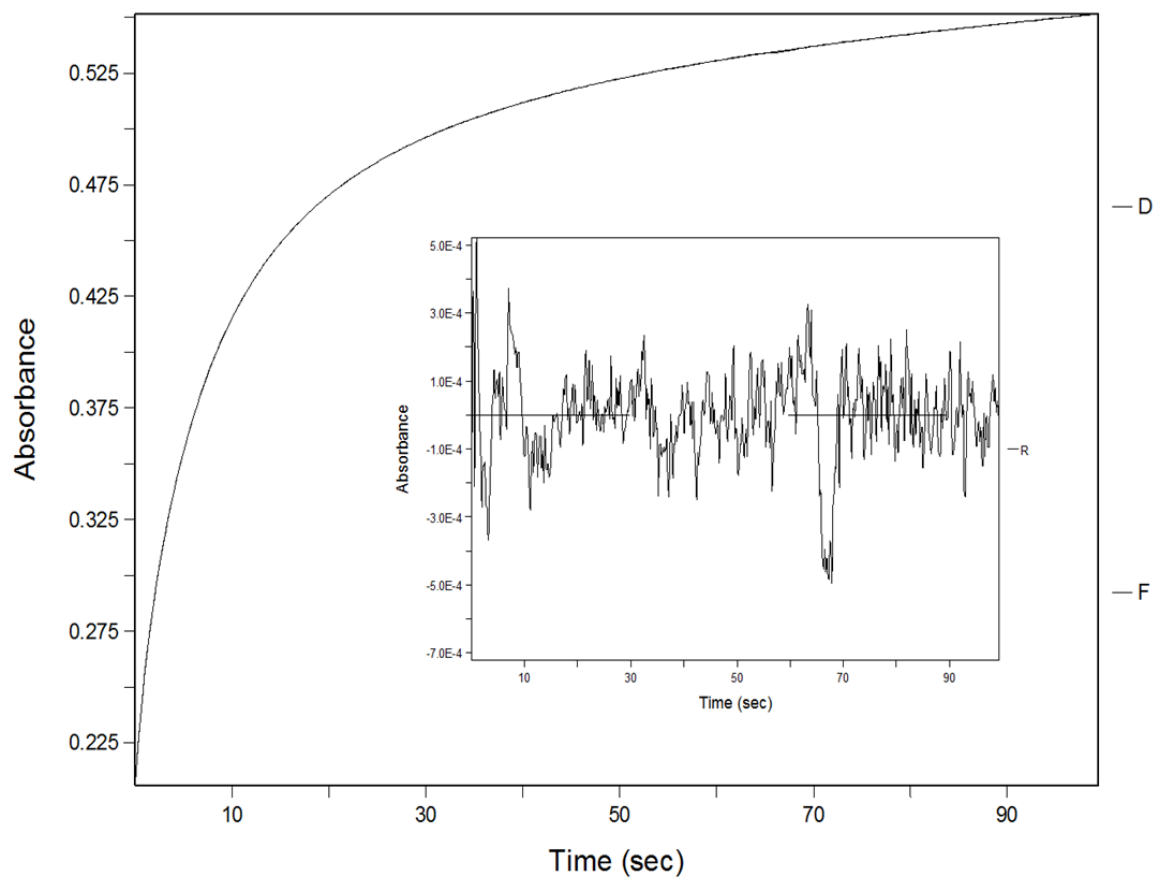

**Figure S13:** Kinetic data and overlay of fit for the reaction of **1** (0.11 mM) and MPP-OL (10.8 mM) and 2-methyl-1-phenylprop-2-yl hydroperoxide (12.1 mM) at 193 K. Inset: residuals from fit.

**Table S1:** Rate data for cyclohexanol

| <b>Step</b>                                       | <b>Experiment A</b>   | <b>Experiment B</b>    | <b>Experiment C</b>    | <b>Average</b> |
|---------------------------------------------------|-----------------------|------------------------|------------------------|----------------|
| $k_f (\text{M}^{-1}\text{s}^{-1})$                | 4.326                 | 9.110                  | 4.4894                 |                |
| $k_r (\text{s}^{-1})$                             | 0.04688               | 0.04814                | 0.04578                |                |
| $k_1 (\text{s}^{-1})$                             | 0.15 (fixed)          | 0.15 (fixed)           | 0.15 (fixed)           |                |
| $k_1^{\text{inhib}}_{\text{obs}} (\text{s}^{-1})$ | $2.36 \times 10^{-7}$ | $3.564 \times 10^{-9}$ | $9.93 \times 10^{-9}$  |                |
| $k_1^{\text{inhib}} (\text{M}^{-1}\text{s}^{-1})$ | $2.65 \times 10^{-5}$ | $3.874 \times 10^{-7}$ | $1.014 \times 10^{-6}$ |                |
| $k_2 (\text{s}^{-1})$                             | 0.1260                | 0.1167                 | 0.1109                 |                |
| $k_3 (\text{s}^{-1})$                             | 0.006601              | 0.004545               | 0.00634                |                |
| <b><math>K_{eq}</math></b>                        | <b>92.7</b>           | <b>189</b>             | <b>98.1</b>            | <b>127</b>     |

Experimental conditions:

- A. [1] = 0.08 mM, [cyclohexanol] = 7.6 mM, [MPPH] = 9.2 mM
- B. [1] = 0.079 mM, [cyclohexanol] = 39 mM, [MPPH] = 9.2 mM
- C. [1] = 0.078 mM, [cyclohexanol] = 78 mM, [MPPH] = 9.2 mM

**Table S2:** Rate data for methanol

|                                                  | <b>Experiment D</b>    | <b>Experiment E</b>    | <b>Experiment F</b>    | <b>Average</b> |
|--------------------------------------------------|------------------------|------------------------|------------------------|----------------|
| $k_f(\text{M}^{-1}\text{s}^{-1})$                | 7.9634                 | 4.238                  | 0.707                  |                |
| $k_r(\text{s}^{-1})$                             | 0.0115                 | 0.005659               | 0.001241               |                |
| $k_1(\text{s}^{-1})$                             | 0.15 (fixed)           | 0.15 (fixed)           | 0.15 (fixed)           |                |
| $k_1^{\text{inhib}}_{\text{obs}}(\text{s}^{-1})$ | $1.194 \times 10^{-4}$ | $6.994 \times 10^{-5}$ | $1.038 \times 10^{-4}$ |                |
| $k_1^{\text{inhib}}(\text{M}^{-1}\text{s}^{-1})$ | 0.009710               | 0.005868               | 0.00844                |                |
| $k_2(\text{s}^{-1})$                             | 0.1283                 | 0.143                  | 0.1332                 |                |
| $k_3(\text{s}^{-1})$                             | 0.00536                | 0.0067                 | 0.00521                |                |
| <b><math>K_{eq}</math></b>                       | <b>692</b>             | <b>748</b>             | <b>707</b>             | <b>716</b>     |

Experimental Conditions:

D. **[1]** = 0.11 mM,  $[\text{CH}_3\text{OH}]$  = 11 mM,  $[\text{MPPH}]$  = 12.3 mM

E. **[1]** = 0.1095 mM,  $[\text{CH}_3\text{OH}]$  = 54 mM,  $[\text{MPPH}]$  = 12.3 mM

F. **[1]** = 0.109 mM,  $[\text{CH}_3\text{OH}]$  = 109 mM,  $[\text{MPPH}]$  = 12.3 mM



**Table S3:** Rate data for MPP-OL

|                                                  | <b>Experiment G</b>    | <b>Experiment H</b>    | <b>Experiment I</b>    | <b>Average</b> |
|--------------------------------------------------|------------------------|------------------------|------------------------|----------------|
| $k_f(\text{M}^{-1}\text{s}^{-1})$                | 8.9281                 | 3.69                   | 2.866                  |                |
| $k_r(\text{s}^{-1})$                             | 0.0452                 | 0.0144                 | 0.011                  |                |
| $k_1(\text{s}^{-1})$                             | 0.15 (fixed)           | 0.15 (fixed)           | 0.15 (fixed)           |                |
| $k_1^{\text{inhib}}_{\text{obs}}(\text{s}^{-1})$ | $1.579 \times 10^{-4}$ | $4.610 \times 10^{-4}$ | $3.398 \times 10^{-4}$ |                |
| $k_1^{\text{inhib}}(\text{M}^{-1}\text{s}^{-1})$ | 0.01305                | 0.0381                 | 0.02808                |                |
| $k_2(\text{s}^{-1})$                             | 0.1156                 | 0.1383                 | 0.1306                 |                |
| $k_3(\text{s}^{-1})$                             | 0.0062                 | 0.0063                 | 0.003712               |                |
| <b><math>K_{eq}</math></b>                       | <b>197</b>             | <b>235</b>             | <b>260</b>             | <b>230</b>     |

Experimental Conditions:

G. [1] = 0.11 mM, [MPP-OL] = 10.8 mM, [MPPH] = 12.1 mM

H. [1] = 0.108 mM, [MPP-OL] = 53.5 mM, [MPPH] = 12.1 mM

I. [1] = 0.106 mM, [MPP-OL] = 106 mM, [MPPH] = 12.1 mM

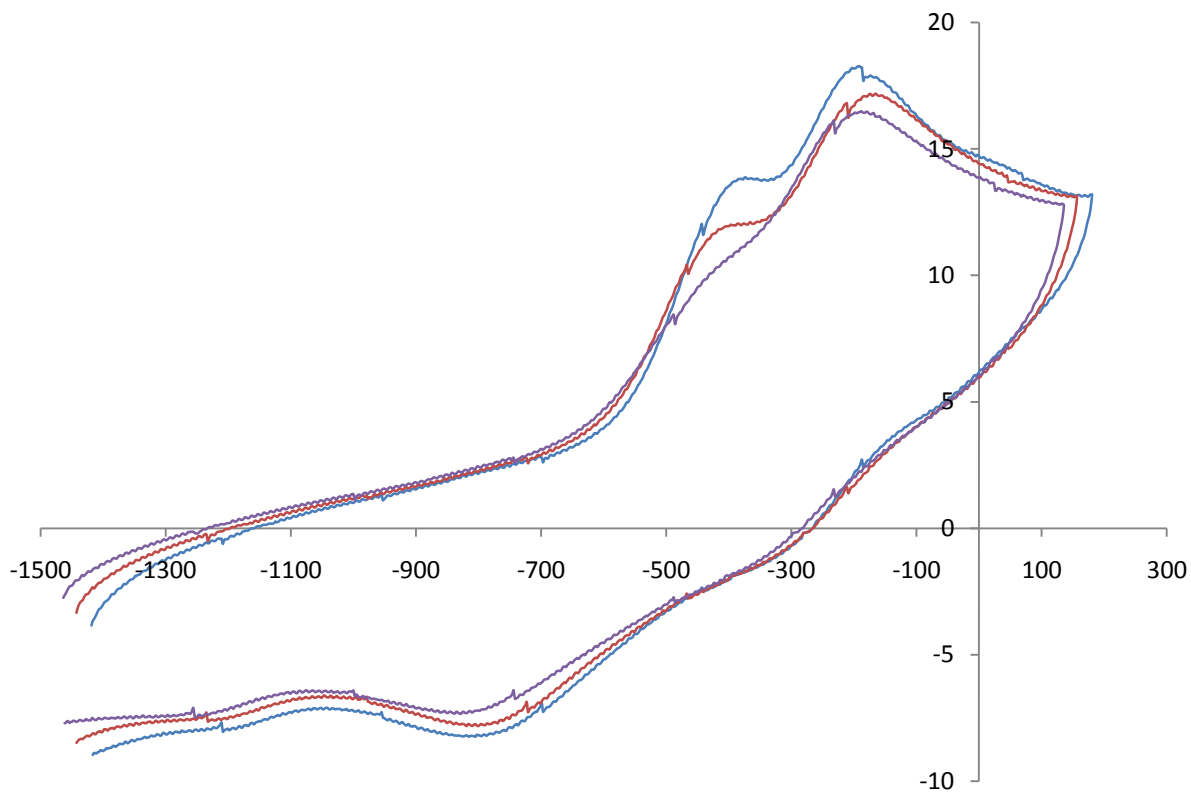

**Figure S14:** Electrochemistry (blue trace) of **1** (0.1 mM) in Electrochemistry (red trace) of **1** (0.098 mM) and cyclohexanol (309 mM). Electrochemistry (purple trace) of **1** (0.091 mM) and cyclohexanol (870 mM). All electrochemistry in DMF with electrolyte (10 mM) and referenced externally to Fc/Fc<sup>+</sup> vs. NHE under anaerobic conditions.

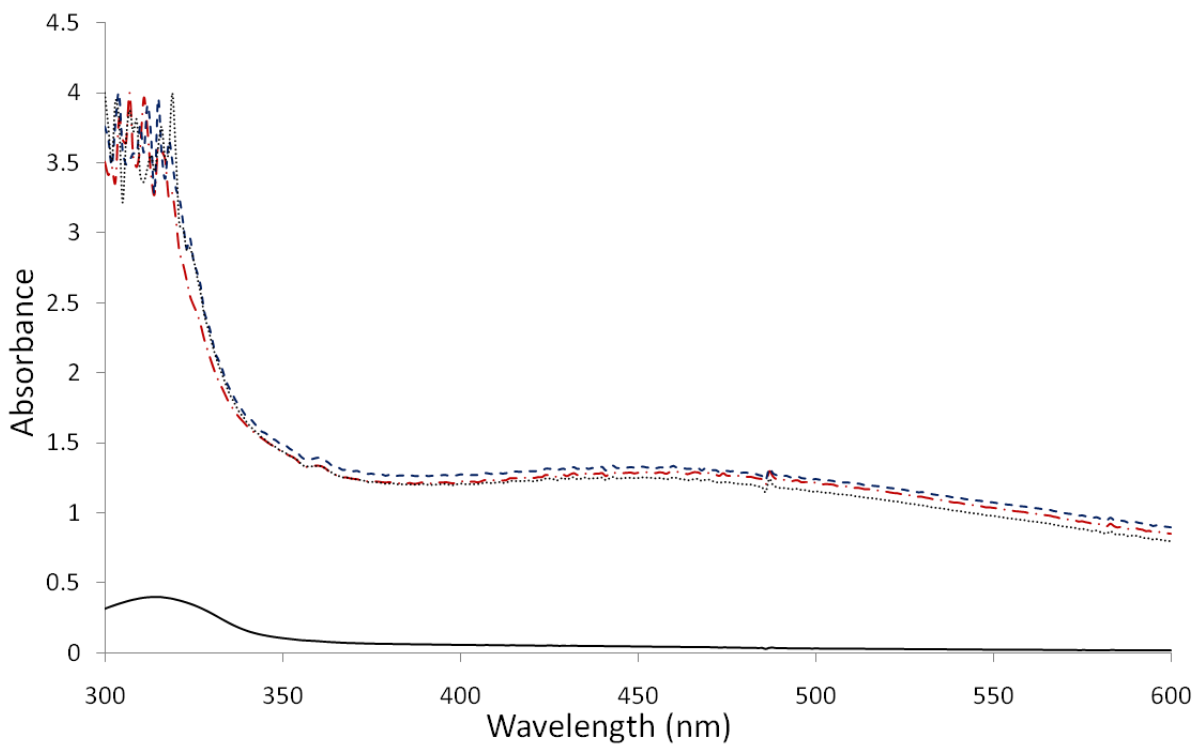

**Figure S15:** UV-vis spectrum of a solution of **1** (0.19 mM) in 70:30 DCM:DMF (v/v) (black line) at  $-74^{\circ}\text{C}$ . A solution of hydroxyurea (0.19 mM) was added to **1** causing a shift in chromophore (red line) followed by the addition of *p*-CN-DMANO (11 mM) (blue line) and no chromophore of **4** observed after 20 minutes (black dashed line)

Equations used in kinetic models and fits for the reaction of **1** with MPPH (**X**) in the presence of ROH (S1-S5, S8) and in the absence of substrate (S6, S7, S9-S11, S13):

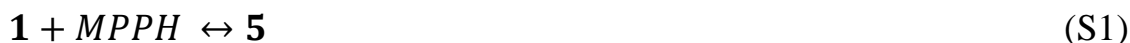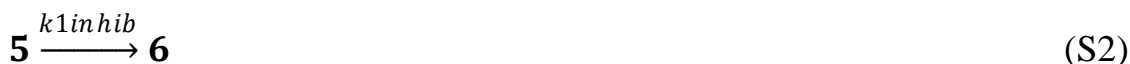

$$\frac{-d[\mathbf{1}]}{dt} = \frac{d[\mathbf{5}]}{dt} = kf[\mathbf{1}][\text{ROH}] \quad (\text{S3})$$

$$\frac{-d[\mathbf{5}]}{dt} = \frac{d[\mathbf{1}]}{dt} = kr[\mathbf{5}] \quad (\text{S4})$$

$$\frac{-d[\mathbf{5}]}{dt} = \frac{d[\mathbf{6}]}{dt} = k_{1inhib}[\mathbf{5}] \quad (\text{S5})$$

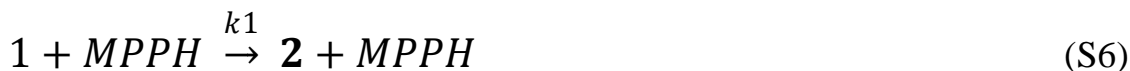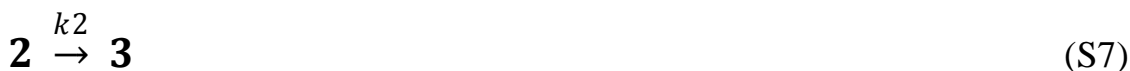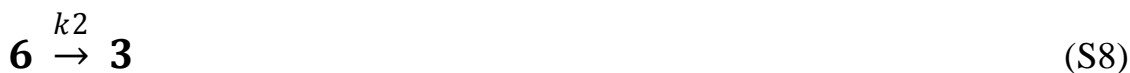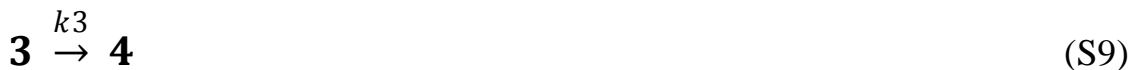

$$\frac{-d[\mathbf{1}]}{dt} = \frac{d[\mathbf{2}]}{dt} = k_1[\mathbf{1}][\text{MPPH}] \quad (\text{S10})$$

$$\frac{-d[\mathbf{2}]}{dt} = \frac{d[\mathbf{3}]}{dt} = k_2[\mathbf{2}] \quad (\text{S11})$$

$$\frac{-d[\mathbf{6}]}{dt} = \frac{d[\mathbf{3}]}{dt} = k_2[\mathbf{6}] \quad (\text{S12})$$

$$\frac{-d[\mathbf{3}]}{dt} = \frac{d[\mathbf{4}]}{dt} = k_3[\mathbf{3}] \quad (\text{S13})$$

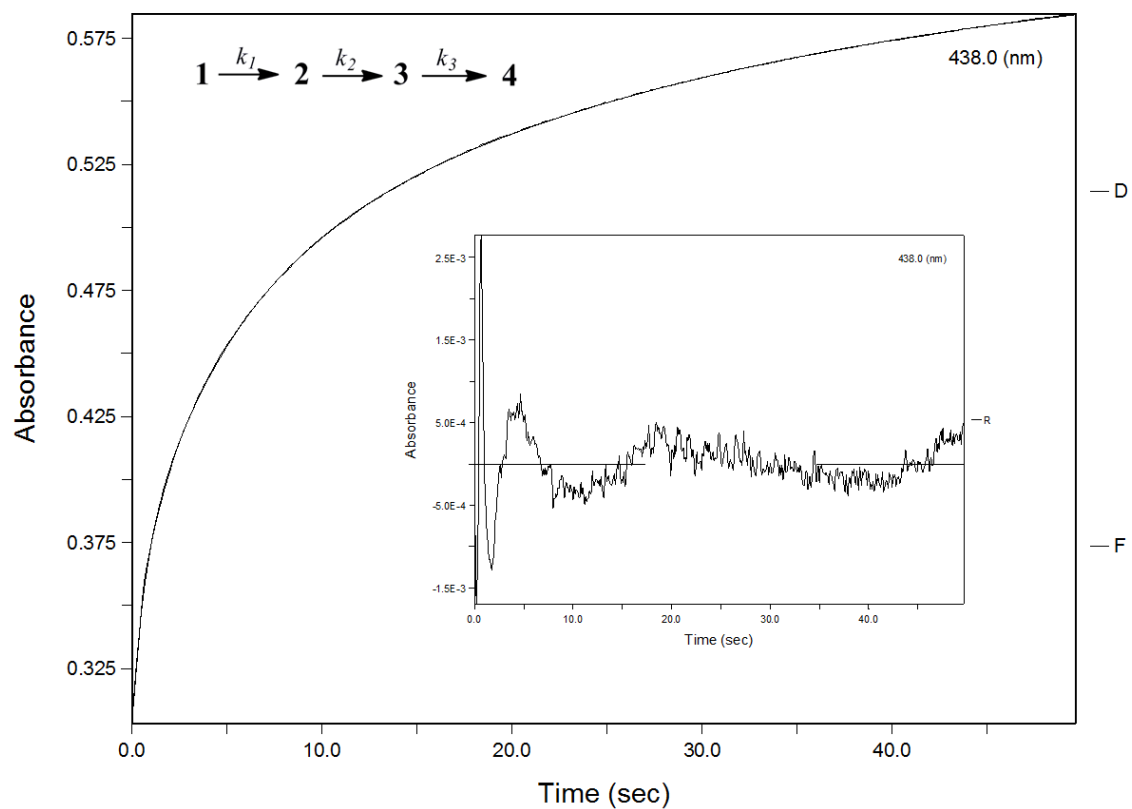

**Figure S16:** Kinetic fit and residuals (Inset) for models that did not result in adequate fits to the data.

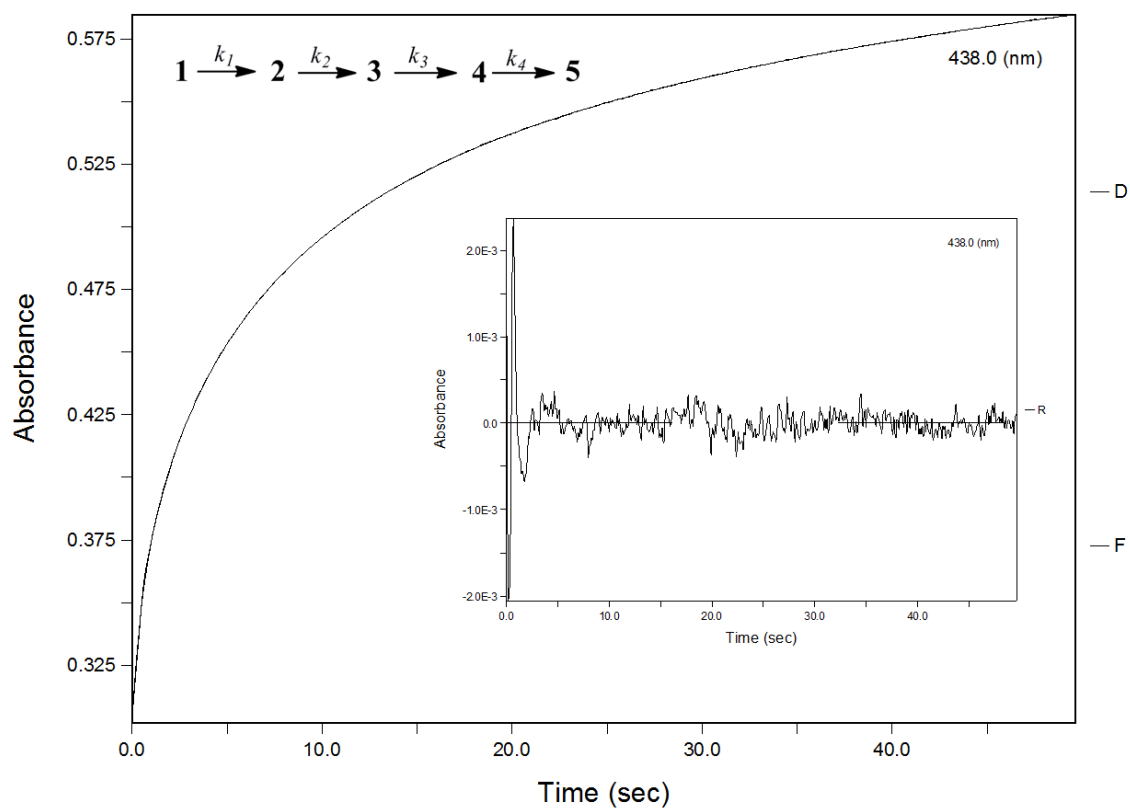

**Figure S17:** Kinetic fit and residuals (Inset) for models that did not result in adequate fits to the data.



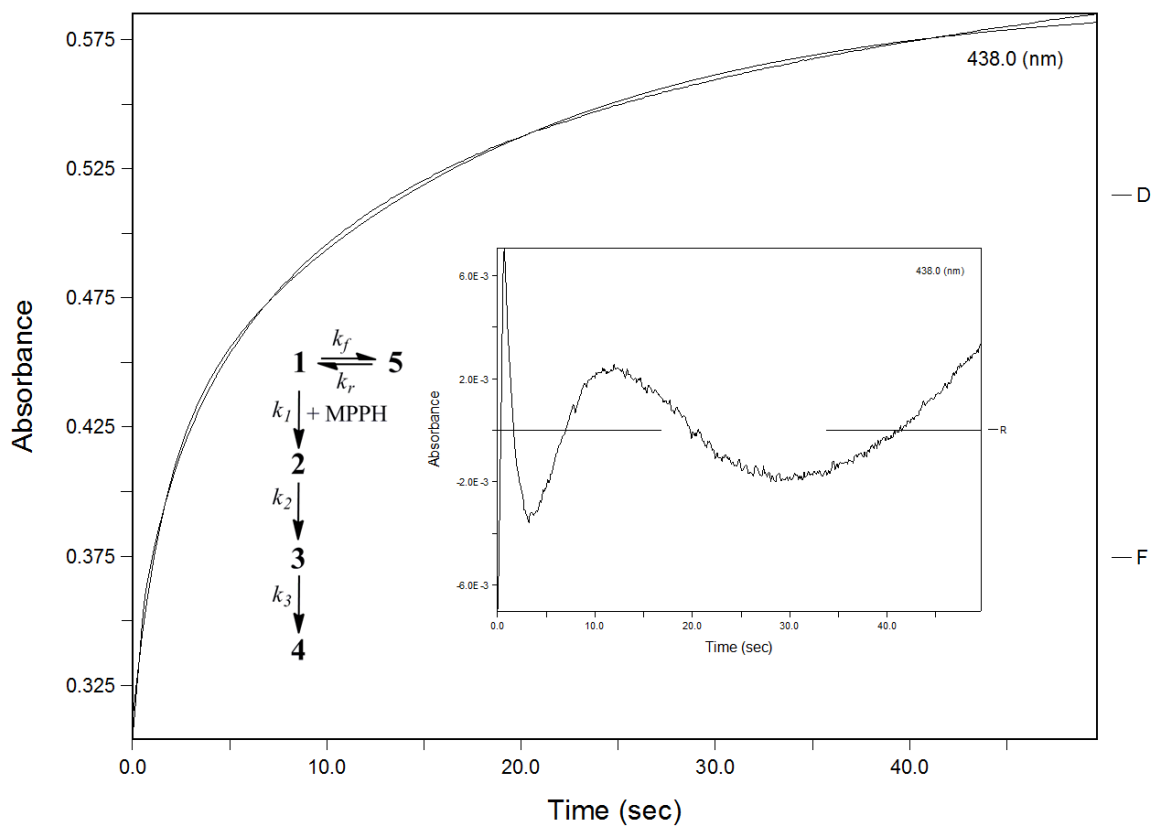

**Figure S19:** Kinetic fit and residuals (Inset) for models that did not result in adequate fits to the data.



**References:**

- S1. S. Mukerjee, A. Stassinopoulos and J. P. Caradonna, *Journal of the American Chemical Society*, 1997, **119**, 8097-8098.
- S2. T. L. Foster and J. P. Caradonna, *Journal of the American Chemical Society*, 2003, **125**, 3678-3679.
- S3. R. R. Hiatt and W. M. J. Strachan, *Journal of Organic Chemistry*, 1963, **28**, 1893-1894.
- S4. G. T. Rowe, C. E. Rogge, E. V. Rybak-Akimova and J. P. Caradonna, *Chemistry--A European Journal*, 2008, **14**, 8303-8311.
- S5. D. A. Skoog, D. M. West, and F. J. Holler. *Fundamentals of Analytical CHEMistry*; 7<sup>th</sup> ed.; Harcourt Brace & Company: Orlando, 1996.
